# Supplementary material
Source: PubMed Central journal article supplement (PMC3365696)

## Supplemental Data

**Table S1.**  $^{15}\text{N}$  and  $^1\text{H}$  temperature coefficients of backbone amide sides in [ $U\text{-}^{15}\text{N}$ ] synthetic elastin.

| Peak No. | Temperature coefficient (ppb/K) |              |
|----------|---------------------------------|--------------|
|          | $^{15}\text{N}$                 | $^1\text{H}$ |
| 1        | -32 +/- 7                       | -5.6 +/- 2.0 |
| 2        | -7 +/- 5                        | -2.3 +/- 2.3 |
| 3        | -20 +/- 4                       | -5.1 +/- 3.0 |
| 4        | -35 +/- 7                       | -4.7 +/- 3.2 |
| 5        | -32 +/- 7                       | -5.0 +/- 2.6 |
| 6        | -40 +/- 21                      | -5.3 +/- 3.4 |
| 7        | -14 +/- 3                       | -4.2 +/- 2.8 |

**Table S2.** Three-residue sequences and their occurrences in tropoelastin.

| R <sub>-1</sub> -Gly-R <sub>+1</sub> |           |            |           | R <sub>-1</sub> -Ala-R <sub>+1</sub> |          |            |           | R <sub>-1</sub> -Val-R <sub>+1</sub> |           |            |           |            |          |
|--------------------------------------|-----------|------------|-----------|--------------------------------------|----------|------------|-----------|--------------------------------------|-----------|------------|-----------|------------|----------|
| PGV                                  | 26        | AGV        | 9         | FGL                                  | 3        | AAA        | 38        | VAP                                  | 6         | GVG        | 31        | PVP        | 1        |
| PGG                                  | 12        | AGL        | 8         | FGA                                  | 2        | AAK        | 21        | VAA                                  | 3         | GVP        | 17        | PVV        | 1        |
| PGA                                  | 11        | AGA        | 5         | FGG                                  | 1        | AAG        | 6         | VAG                                  | 2         | GVA        | 11        | <u>PVX</u> | <u>2</u> |
| PGF                                  | 4         | AGI        | 4         | FGP                                  | 1        | AAQ        | 2         | VAD                                  | 1         | GVL        | 5         |            |          |
| PGL                                  | 3         | AGG        | 1         | FGV                                  | 1        | AAV        | 2         | <u>VAX</u>                           | <u>12</u> | GVV        | 3         |            |          |
| PGI                                  | 2         | AGK        | 1         | <u>FGX</u>                           | <u>8</u> | AAR        | 1         |                                      |           | GVK        | 2         |            |          |
| PGK                                  | 1         | AGP        | 1         |                                      |          | AAZ        | 1         | LAA                                  | 1         | GVF        | 1         |            |          |
| <u>PGX</u>                           | <u>59</u> | AGQ        | 1         | TGA                                  | 1        | <u>AAZ</u> | <u>71</u> | LAG                                  | 1         | GVS        | 1         |            |          |
|                                      |           | AGY        | 1         | TGK                                  | 1        |            |           | LAP                                  | 1         | GVY        | 1         |            |          |
| GGV                                  | 14        | <u>AGX</u> | <u>31</u> | TGT                                  | 1        | GAG        | 17        | <u>LAX</u>                           | <u>3</u>  | <u>GVX</u> | <u>72</u> |            |          |
| GGL                                  | 6         |            |           | TGV                                  | 1        | GAA        | 7         |                                      |           |            |           |            |          |
| GGA                                  | 5         | LGG        | 9         | <u>TGX</u>                           | <u>4</u> | GAL        | 5         | PAA                                  | 4         | AVP        | 3         |            |          |
| GGI                                  | 4         | LGV        | 6         |                                      |          | GAF        | 2         | PAV                                  | 1         | AVT        | 1         |            |          |
| GGP                                  | 2         | LGA        | 5         | IGG                                  | 1        | GAI        | 2         | <u>PAX</u>                           | <u>5</u>  | AVV        | 1         |            |          |
| GGF                                  | 1         | LGK        | 1         | IGP                                  | 1        | GAR        | 2         |                                      |           | <u>AVX</u> | <u>5</u>  |            |          |
| GGG                                  | 1         | LGP        | 1         | <u>IGX</u>                           | <u>2</u> | GAV        | 2         | EAA                                  | 1         |            |           |            |          |
| GGK                                  | 1         | LGY        | 1         |                                      |          | GAC        | 1         | EAQ                                  | 1         | VVG        | 2         |            |          |
| GGY                                  | 1         | <u>LGX</u> | <u>23</u> |                                      |          | <u>GAX</u> | <u>38</u> | <u>EAX</u>                           | <u>2</u>  | VVP        | 2         |            |          |
| <u>GGX</u>                           | <u>35</u> |            |           |                                      |          |            |           |                                      |           | VVS        | 1         |            |          |
|                                      |           | YGA        | 4         |                                      |          | KAA        | 12        | QAA                                  | 2         | <u>VVX</u> | <u>5</u>  |            |          |
| VGW                                  | 13        | YGV        | 2         |                                      |          | KAG        | 2         |                                      |           |            |           |            |          |
| VGG                                  | 9         | YGL        | 1         |                                      |          | KAP        | 2         | SAA                                  | 1         | LVP        | 3         |            |          |
| VGA                                  | 5         | YGP        | 1         |                                      |          | KAC        | 1         | SAG                                  | 1         | LVG        | 1         |            |          |
| VGI                                  | 2         | YGY        | 1         |                                      |          | KAQ        | 1         | <u>SAX</u>                           | <u>2</u>  | <u>LVX</u> | <u>4</u>  |            |          |
| VGL                                  | 2         | <u>YGX</u> | <u>9</u>  |                                      |          | <u>KAX</u> | <u>18</u> |                                      |           |            |           |            |          |
| VGP                                  | 2         |            |           |                                      |          |            |           | DAA                                  | 1         | KVA        | 1         |            |          |
| VGT                                  | 2         |            |           |                                      |          |            |           | IAG                                  | 1         | KVP        | 1         |            |          |
| <u>VGX</u>                           | <u>35</u> |            |           |                                      |          |            |           | RAA                                  | 1         | <u>KVX</u> | <u>2</u>  |            |          |
|                                      |           |            |           |                                      |          |            |           | FAG                                  | 1         |            |           |            |          |

**Figure S1.** Pulse sequence for the “semi-constant time” 2D  $^1\text{H}$  -  $^{15}\text{N}$  rINEPT-HETCOR experiment (Ref. S1).  $^1\text{H}$  chemical shift evolves *via* incrementation of  $t_{1a}$ , and the spectral width in the  $^1\text{H}$  indirect dimension was 2400 Hz. The  $t_{1b}$  delay was defined as  $t_{1b} = t_{1a} - 2\tau$ . The delay  $\tau$  was set to 1.6 ms. The phase of the first  $^1\text{H}$   $90^\circ$  pulse was incremented via the States method (Ref. S2). The phase cycling scheme was  $\phi 1: [+x]_8 [-x]_8$ ;  $\phi 2: [+x -x]$ ;  $\phi 3: [+y -y]$ ;  $\phi 4: [+x]_4 [+y]_4 [-x]_4 [-y]_4$ ;  $\phi 5: [+x -x]_2 [+y -y]_2$ ;  $\phi \text{rec}: [+x]_2 [-x]_2 [+y]_2 [-y]_2$  (Ref. S3).

**Figure S2.** Spin rate dependence of  $^{15}\text{N}$  rINEPT (A) and  $^1\text{H}$  MAS (B) spectra. Dependence of spectral intensities on  $\nu_r$  for  $^{15}\text{N}$  rINEPT spectra is shown in (C).

**Figure S3.** Detailed illustration of the calculated contour plot, using Ref. S4 (denatured peptide measurements). (A) The black lines point to the calculated  $^{15}\text{N}$  and  $^1\text{H}$  chemical shifts for the indicated 3-aa sequences. A Gaussian is centered at each set of chemical shift values and is weighted by the relative number of occurrences of the 3-aa sequence in tropoelastin (given in parentheses). “Peaks” result from overlap of chemical shifts with little or no differences and/or high occurrences of 3-aa sequences in tropoelastin. (B) Color contours only. Numbers in parentheses give the total number of occurrences for these sequences in tropoelastin.

**Figure S4.** Comparison of calculated and experimental (5 °C) chemical shifts, using the semi-empirical methods of Refs. S4 (denatured peptide) and S5 (compiled database information). Comparisons are made with the random coil (S4A-S4D),  $\beta$ -strand (S4E-S4F), and the  $\alpha$ -helix (S4G-S4H). The method using the denatured peptide (ref. S4) is used for S4A-S4B, whereas the database method (ref. S5) is used for the rest. The experimental spectra are illustrated with the grey contours. Color contours denote the calculated  $^{15}\text{N}$  and  $^1\text{H}$  chemical shifts for the Gly (G), Ala (A), and Val (V), with assigned amino acid in **bold**. An “X” indicates 2 or more residues in the 3<sup>rd</sup> position of the 3-aa sequence. The predicted “peaks” were plotted as Gaussians that are centered at the (predicted) shifts and weighted by the number of occurrences in the sequence of tropoelastin.

## References

- S1. Helmus, J. J., Surewicz, K., Surewicz, W. K., and Jaroniec, C. P. (2010) *J. Am. Chem. Soc.* **132**, 2393-2403
- S2. States, D. J., Haberkorn, R. A., and Ruben, D. J. (1982) *J. Magn. Reson.* **48**, 286-292
- S3. Elena, B., Lesage, A., Steuernagel, S., Bockmann, A., and Emsley, L. (2005) *J. Am. Chem. Soc.* **127**, 17296-17302
- S4. Schwarzinger, S., Kroon, G. J. A., Foss, T. R., Chung, J., Wright, P. E., and Dyson, H. J. (2001) *J. Am. Chem. Soc.* **123**, 2970-2978
- S5. Wang, Y. J., and Jardetzky, O. (2002) *J. Am. Chem. Soc.* **124**, 14075-14084

Figure S1

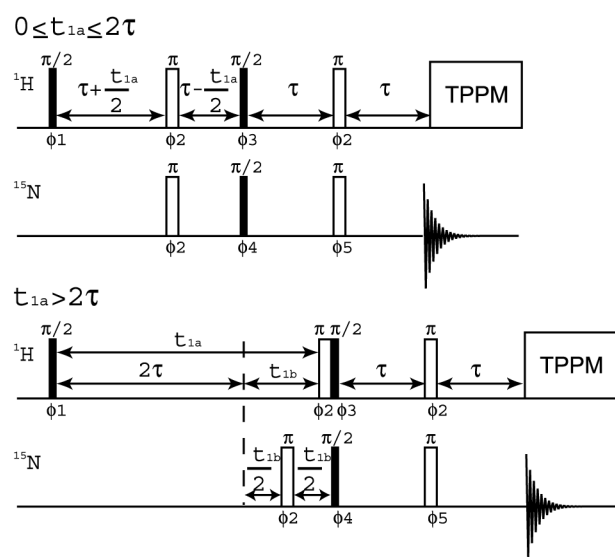

Figure S2

A)  $^{15}\text{N}$  rINEPT

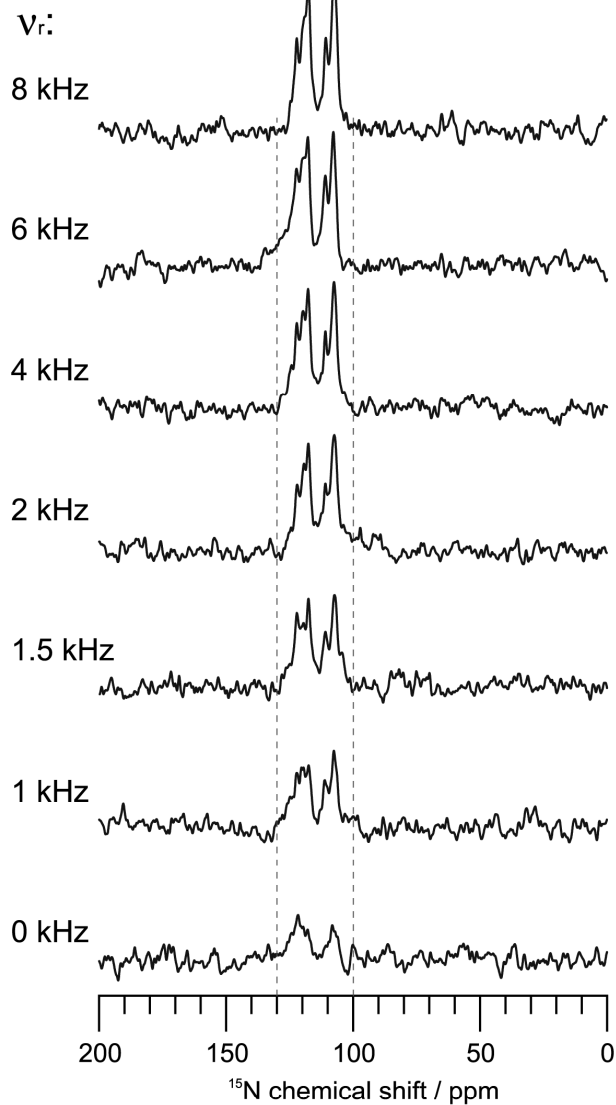

B)  $^1\text{H}$  MAS

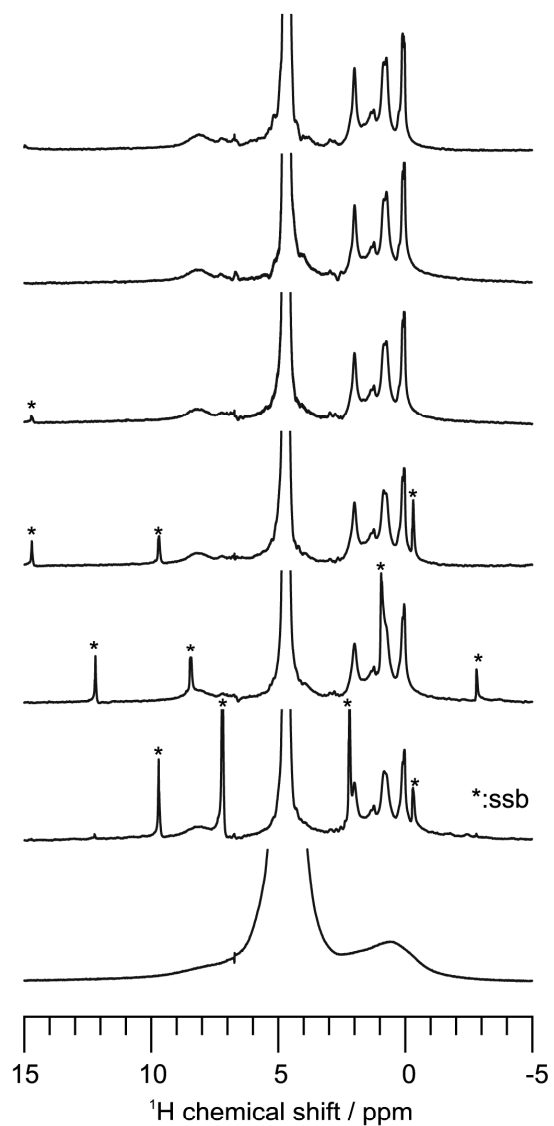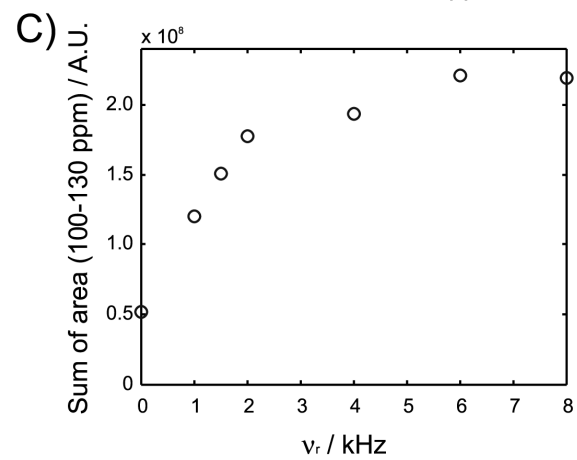

Figure S3

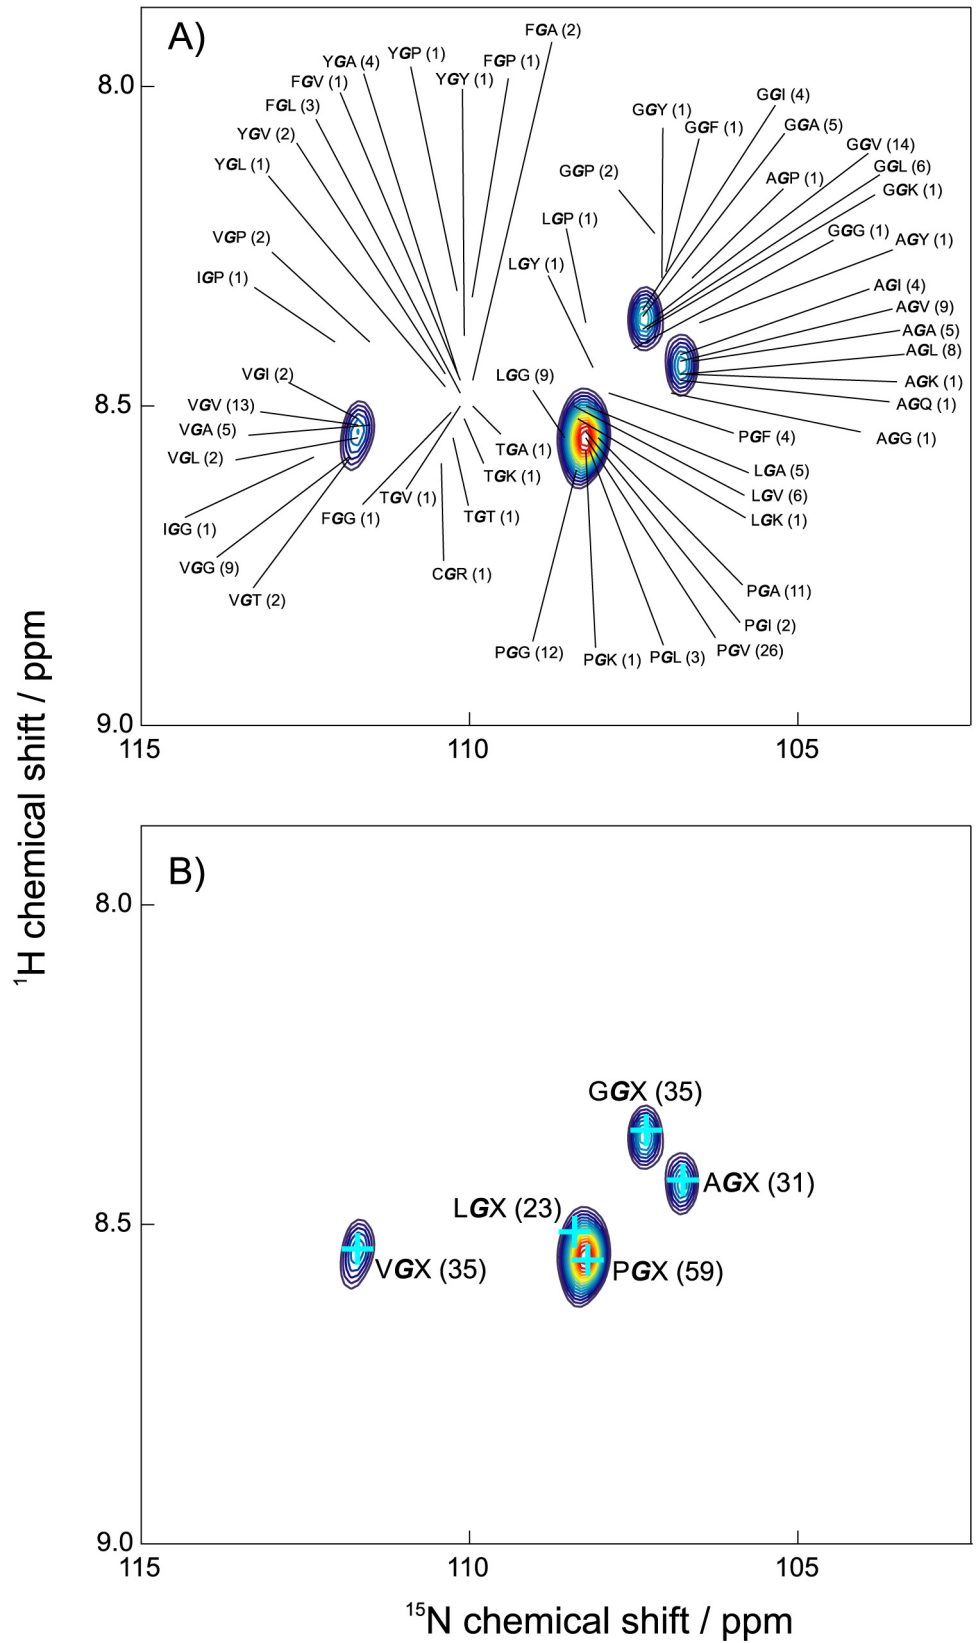

Figure S4

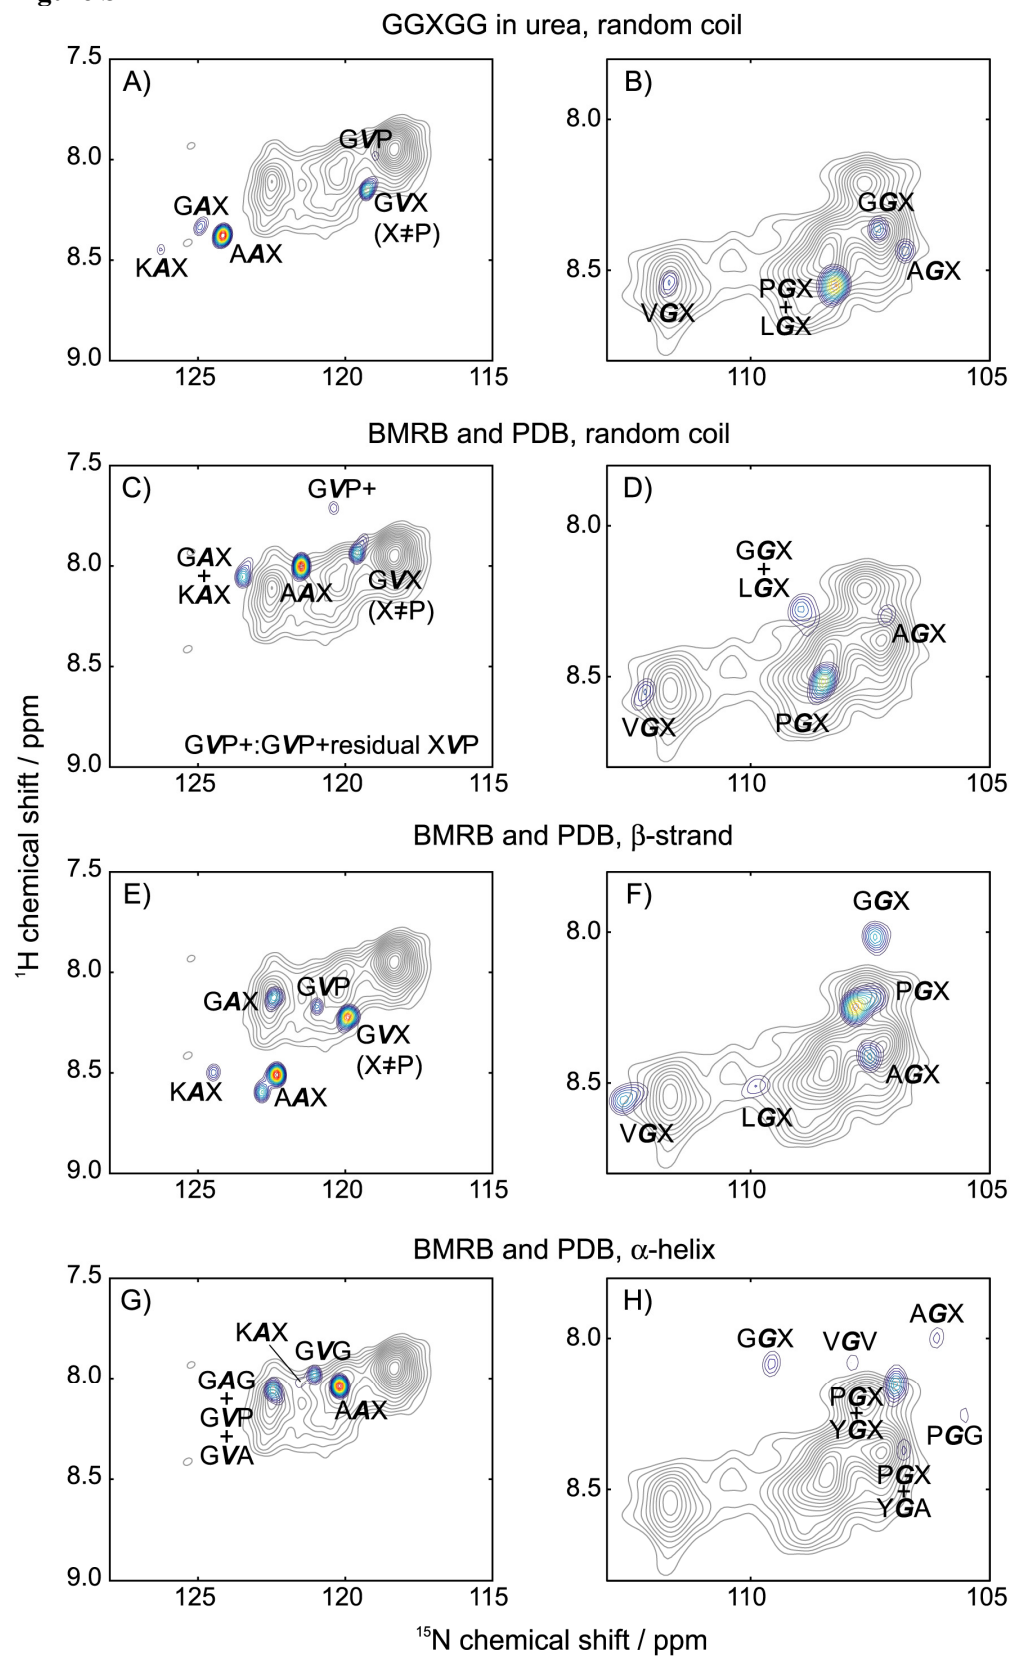

Supplement: supp_M111.285163_jbc.M111.285163-1.pdf [file supp_M111.285163_jbc.M111.285163-1.pdf]
